# Supplementary material for: Peripheral inflammatory biomarkers of methamphetamine withdrawal based on the neuro-inflammation hypothesis: the possible improvement effect of exercise
Source: Research Square preprint supplement (doi:10.21203/rs.3.rs-995068/v2), 2021-11-15
Supplement: Supplementary file 1 [file 59c2fb1869529f703722a58d.xlsx]

## Sheet: IL-1β
		0	4	8				0	4	8				0	4	8
CE						CC						NCC
42	杨浩	22.42	21.87	21.36		38	陈向阳	27.03	26.33	24.97		68	盛韬	20.4	19.25	18.25
16	陈林	25.72	20	19.55		39	刘敏	22.74	22.01	20.75		69	罗金文	15.95	15.25	16.23
14	李安兵	27.77	17.14	16.83		1	吴树	23.86	22.65	23		71	张龙	17.94	16.24	16.85
17	曾继亮	26.62	23	22.95		40	刘海浪	25.9	24.37	22.39		72	江才华	15.11	14.25	14.23
28	刘雄伟	26.31	23.32	22.67		19	张斌	24.9	24.1	23.17		77	蔡明光	15.43	15.25	16.88
29	杨先武	27.3	25.23	21.31		41	李超	27.49	26.42	18.92		78	周斌	18.77	18.11	18.25
30	刘宗付	27.7	18.54	17.78		34	苏兵	21.76	21.8	21.9		79	唐定国	18.67	17.25	19.25
37	张彬波	23.1	22.6	21.4		47	郑伟伟	23.62	22.97	21.36		80	陈浩	16.41	16.22	15.68
3	刘京肖	24.02	20.25	20.13		13	禹巧	23.12	21.46	22.36		81	宋海波	19.42	18.22	19.02
4	廖明	23.17	23.19	23.41		15	周华兵	25.57	25.18	21.18		84	吴海波	19.73	18.89	19.02
5	盛金博	22.61	18.92	17.81		24	邹巍	23.69	22.74	21.74		85	彭桦	19.92	17.99	18.89
9	李龙	23.69	22.85	19.26		56	晋维	26.26	22.54	23.34		88	李文雄	16.35	17.12	17.25
18	石柱	27.38	24.32	16.59		57	廖秋生	26.88	21.88	20.88		92	何义	16.05	16.01	16.05
36	廖洪亭	28.31	26.88	20.49		58	李根鹏	24.75	20.75	19.15		94	曾凡彬	17.17	16.88	16.89
32	饶作兴	23.3	23.11	22.9		59	周江	22.13	23.28	22.78		95	贺盛开	18.03	17.56	18.01
20	朱葱葱	24.69	24.85	19.51		60	阳敏	24.15	24.88	24.38		96	黄婧波	15.87	14.22	15.22
33	刘源	24.44	18.87	16.65		61	刮德军	27.65	22.89	23.89		97	杨其林	17.09	17.58	16.88
7	徐炯	25.11	23.85	19.43		62	刘丹	23.3	22.56	21.58		98	唐豹	20.55	20.56	20.12
21	宋镪玮	24.92	19.35	17.02		48	晏佞斌	24.18	23.47	22.35		99	李貌	16.01	16.88	16.23
10	高彪	22.8	21.85	20.21		49	戴治华	27.84	26.63	26.48		100	陆胜	18.83	18.89	17.22
11	林飞	25.29	21.22	23.21		50	彭显国	26.14	24.25	23.99
12	陈舒	26.54	25.75	22.27		52	刘梓林	28.07	20.89	22.4
44	李建国	28.08	26.35	22.43		53	张国梁	22.38	24.68	23.25
22	吴谦	26.39	24.85	18.89		63	周伟	26.13	22.85	22.23
23	胡呈武	24.17	23.71	22.08		67	钟志明	25.77	22.01	22.51
46	潘文广	22.26	22.98	22.63		54	胡帅	25.88	24.02	24.13
26	谢颖	26.38	22.25	16.64		55	张超	21.92	22.58	22.59

## Sheet: TNF-α
		0	4	8				0	4	8				0	4	8
CE						CC						NCC
42	杨浩	32.3	27.25	25.41		38	陈向阳	39.32	30.12	30.43		68	盛韬	21.15	20.25	20.35
16	陈林	32.85	27.43	25.02		39	刘敏	32.49	31.12	30.78		69	罗金文	25.76	25.22	24.85
14	李安兵	26.53	25.54	23.66		1	吴树	29.16	28.74	27.45		71	张龙	22.62	21.12	20.89
17	曾继亮	27.29	26.36	25.28		40	刘海浪	31.12	30.99	30.46		72	江才华	24.12	23.12	24.32
28	刘雄伟	31.54	29.25	21.52		19	张斌	27.05	26.45	25.08		77	蔡明光	22.97	20.89	22.21
29	杨先武	28.98	26.92	24.46		41	李超	29.1	28.93	28.09		78	周斌	24.14	19.65	20.25
30	刘宗付	32.95	28.43	23.94		34	苏兵	26.66	26.12	25.7		79	唐定国	20.31	20.06	20.01
37	张彬波	31.73	29.89	25.33		47	郑伟伟	32.47	31.17	29.45		80	陈浩	24.98	22.21	24.32
3	刘京肖	26.52	24.25	21.65		13	禹巧	30.07	29.98	28.82		81	宋海波	20.99	19.89	19.98
4	廖明	32.91	29.55	26.78		15	周华兵	31.21	30.41	29.18		84	吴海波	26.16	23.12	24.22
5	盛金博	30.99	29.23	26.57		24	邹巍	32.15	31.68	28.87		85	彭桦	19.81	19.89	19.77
9	李龙	30.29	29.32	27.57		56	晋维	29.98	30.21	28.32		88	李文雄	19.57	19.02	19.21
18	石柱	28.04	28.41	27.61		57	廖秋生	32.53	31.59	29.44		92	何义	22.71	20.65	20.15
36	廖洪亭	29.86	29.25	28.55		58	李根鹏	32.08	30.25	27.69		94	曾凡彬	22.05	20.85	21.02
32	饶作兴	33.09	31.23	26.86		59	周江	27.33	28.8	27.77		95	贺盛开	24.37	23.32	23.02
20	朱葱葱	31.22	28.36	21.24		60	阳敏	33.73	30.32	28.64		96	黄婧波	19.76	17.89	19.12
33	刘源	29.74	28.99	27.18		61	刮德军	29.02	29.89	28.42		97	杨其林	22.08	19.85	20.98
7	徐炯	29.19	27.32	24.57		62	刘丹	28.08	27.68	27.72		98	唐豹	20.05	19.25	19.78
21	宋镪玮	31.73	27.18	21.17		48	晏佞斌	31.74	29.69	28.41		99	李貌	23.3	22.21	23.01
10	高彪	33.27	31.21	28.92		49	戴治华	32.05	28.89	29.52		100	陆胜	20.78	20.14	20.25
11	林飞	28.04	27.41	23.51		50	彭显国	29.45	27.58	27.41
12	陈舒	33.5	31.22	28.61		52	刘梓林	27.71	28.98	28.02
44	李建国	32.82	30.24	26.48		53	张国梁	33.53	30.23	27.48
22	吴谦	27.82	26.41	23.18		63	周伟	32.03	29.12	29.29
23	胡呈武	27.42	26.33	23.52		67	钟志明	30.92	28.58	26.71
46	潘文广	30.8	29.14	27.71		54	胡帅	31.6	29.12	27.74
26	谢颖	28.73	26.49	22.22		55	张超	31.25	30.32	29.05

## Sheet: IL-6
		0	4	8				0	4	8				0	4	8
CE						CC						NCC
42	杨浩	17.78	17.7	17.64		38	陈向阳	16.19	16.28	17.7		68	盛韬	12.06	12.09	12.1
16	陈林	15.93	16.21	16.24		39	刘敏	18.14	17.59	15.79		69	罗金文	11.61	11.2	11.25
14	李安兵	19.65	17.42	13.03		1	吴树	17.72	15.89	13.67		71	张龙	12.14	11.89	11.25
17	曾继亮	15.21	15.3	15.41		40	刘海浪	16.89	17.31	17.6		72	江才华	11.06	12.25	13.32
28	刘雄伟	19.76	15.45	13.62		19	张斌	15.76	14.22	13.18		77	蔡明光	14.99	14.89	12.98
29	杨先武	19.66	17.11	14.66		41	李超	17.65	16.47	15.96		78	周斌	14.35	13.56	12.85
30	刘宗付	15.52	15.47	15.95		34	苏兵	15.9	16.43	17.18		79	唐定国	12.51	11.87	11.98
37	张彬波	16.83	15.3	14.02		47	郑伟伟	17.46	15.89	14.83		80	陈浩	10.63	10.89	12.39
3	刘京肖	16.57	14.78	12.01		13	禹巧	15.31	14.12	13.93		81	宋海波	10.9	11.98	13.98
4	廖明	15.6	14.22	13.74		15	周华兵	16.33	14.52	13.99		84	吴海波	14.96	12.46	13.21
5	盛金博	16.44	15.99	14.43		24	邹巍	17.12	17.01	17.21		85	彭桦	13.36	13.22	12.85
9	李龙	15.26	14.79	13.8		56	晋维	18.14	17.44	16.34		88	李文雄	13.82	11.23	10.32
18	石柱	19.37	17.89	15.21		57	廖秋生	15.84	16.88	16.86		92	何义	14.67	10.78	11.32
36	廖洪亭	16.36	17.89	17.73		58	李根鹏	18.85	17.41	15.07		94	曾凡彬	14.57	12.25	14.38
32	饶作兴	18.67	17.45	13.13		59	周江	17.02	15.89	16.39		95	贺盛开	14.85	12.01	12.22
20	朱葱葱	15.58	14.39	13.11		60	阳敏	16.46	18.89	17.98		96	黄婧波	14.39	12.45	11.98
33	刘源	16.39	16.22	16.19		61	刮德军	18.88	17.36	17.25		97	杨其林	10.84	10.87	10.65
7	徐炯	19.28	17.45	14.02		62	刘丹	18.05	16.47	14.39		98	唐豹	12.5	10.89	11.2
21	宋镪玮	19.44	17.45	13.58		48	晏佞斌	18.5	16	15.39		99	李貌	10.63	10.01	10.8
10	高彪	18.08	17.21	14.54		49	戴治华	16	16.89	16.08		100	陆胜	13.84	12.87	13.01
11	林飞	15.25	14.75	12.32		50	彭显国	15.91	14.88	14.43
12	陈舒	17.99	16.21	14.05		52	刘梓林	16.99	16.32	16.66
44	李建国	18.49	18.11	17.9		53	张国梁	20.02	17.23	15.43
22	吴谦	16.83	15.42	14.45		63	周伟	20.05	14.98	14.59
23	胡呈武	16.99	16.11	13.17		67	钟志明	16.06	18.21	18.33
46	潘文广	16.45	16.5	16.56		54	胡帅	17.95	17.11	17.51
26	谢颖	18.54	16.99	15.3		55	张超	17.57	18.99	18.25

## Sheet: VR-VAS
NCC	Pre	Post	CC	Pre	Post	CE	Pre	Post
盛韬	5	10	陈向阳	60	70	杨浩	45	10
罗金文	0	5	刘敏	80	85	陈林	50	10
张龙	3	5	吴树	65	70	李安兵	40	15
江才华	3	0	刘海浪	75	75	曾继亮	90	20
蔡明光	2	5	张斌	90	65	刘雄伟	40	10
周斌	8	5	李超	60	30	杨先武	30	20
唐定国	5	10	苏兵	60	35	刘宗付	65	30
陈浩	10	3	郑伟伟	45	50	张彬波	35	10
宋海波	6	0	禹巧	30	30	刘京肖	100	0
吴海波	10	0	周华兵	60	80	廖明	65	10
彭桦	8	10	邹巍	45	80	盛金博	30	10
李文雄	5	5	晋维	60	80	李龙	30	10
何义	7	0	廖秋生	55	10	石柱	30	30
曾凡彬	3	5	李根鹏	50	20	廖洪亭	80	40
贺盛开	10	0	周江	40	15	饶作兴	30	10
黄婧波	5	0	阳敏	80	10	朱葱葱	50	10
杨其林	3	0	刮德军	50	10	刘源	90	20
唐豹	5	0	刘丹	50	30	徐炯	90	3
李貌	10	0	晏佞斌	45	20	宋镪玮	60	20
陆胜	5	0	戴治华	40	5	高彪	70	20
			彭显国	100	90	林飞	100	10
			刘梓林	75	30	陈舒	30	20
			张国梁	65	80	李建国	60	50
			周伟	40	40	吴谦	65	0
			钟志明	45	30	胡呈武	54	30
			胡帅	75	30	潘文广	80	20
			张超	70	85	谢颖	70	0

## Sheet: DDQ
Pre	desire	negative	control	Post	desire	negative	control
CE	5	4	2		1.3	2.5	5
	4	5.3	4		3	4.3	4
	5	4.8	3		2.7	4	4.5
	3.9	2.5	1		1	1	5.5
	5.3	4.8	2		2	1	2.5
	3.9	3.5	2.5		1.1	1.8	3.5
	3.9	3.5	2.5		1.1	1	4
	3.3	4.3	2		1.4	1.3	3.5
	3.3	3.5	3.5		1.1	1	4
	4.4	4.8	1		1.3	1.5	4.5
	3.3	4.3	4		1.6	1	6
	3.9	3	1		1	1	7
	5.3	4.8	4		3.1	2.8	4.5
	5.9	3.5	3.5		1.1	1	4
	3.9	4	4		2	2.8	3.5
	5.3	5.3	1		2	3	4
	2.3	6.5	4		4.6	4	3
	4.6	4.8	1.5		1.3	1.5	4.5
	5	6.3	4.5		2.9	2.5	4
	4.1	3	4		1.4	1.3	4
	5.9	5.3	3		1	2.5	5.5
	4	4	1.5		3	3	4
	4.1	6.3	1		1.3	1.3	3.5
	4.4	4.8	1		1	1	4
	5.9	3	5		3.3	1.8	4
	5.3	4.3	4		2.1	2	4
	5.4	6.5	3.5		1	4	6
CC	4.1	4	5.5		2.6	2.3	4
	4.1	4.3	4		3.3	4	3
	6	5.3	2.5		3	1	4
	4	5	4		2.7	6	2.5
	5.3	4.3	4		4.6	6	2.5
	3.9	4	4		3	3.8	4
	3.1	4	4.5		4.7	5	3
	4.6	3	2		4.7	6	2.5
	4	5.3	3		2.7	2.3	3.5
	4.4	4.8	1		1	1	3.5
	6	4	3		2.7	3.8	4
	5.9	3	4.5		1.1	1.5	3
	3.4	4.8	2		4.4	4.8	2
	4.1	4.8	3.5		1.3	1.5	3
	5.9	3.5	3		1.3	1.5	4.5
	5.4	3	2		1.6	1.3	3.5
	5.9	2.3	6		1.9	2.8	3
	3.9	3.5	2.5		1.3	2	3
	4.4	4.8	1		1.4	2	4.5
	3.9	5	3.5		1.3	1.5	2.5
	6	6.3	4		3.5	4	3.5
	5.4	4.8	3.5		1.5	1.5	2
	3.9	3.8	2		1	1	4
	4	5	1		1.6	4	5.5
	4.4	4.3	2.5		3.3	3.8	2
	4	4.8	4		4.6	2	4
	6	5.3	1		1	1	2
NCC	1	1	4		1	1	5
	1.6	2.5	5		1	1	6
	1	1	5		1.4	1.8	4.5
	1	1	4		1	1	5
	1	1	6		1	1	6
	1	1.3	7		1	1	5
	1.9	1.5	6		1.7	1.3	4.5
	1	1	4.5		1	1	5
	3	3.5	4		2	2.8	3
	3.9	2.3	4		2.9	3.8	4.5
	1.1	1.3	6.5		1	1	5
	1	1.3	5		1	1	5
	1	1.5	5		1	1	4.5
	1.9	1	7		2.1	2.5	6
	1.9	3.2	6		1	1	4
	1	1	6		9	1	6
	1	1	5		1	1	5.5
	4	2.3	2.5		3	2.8	5
	1.7	2.3	4.5		1	1	6
	2.7	2.8	3		1.9	2.8	5

## Sheet: heart
NCC	第一次vas前测分值	第二次vas前测	第三次VAS前测分值	第四次VAS前测分值	第一次心率	第二次心率	第三次心率	第四次心率	第一次收缩压	第二次收缩压	第三次收缩压	第四次收缩压	第一次舒张压	第二次收缩压	第三次收缩压	第四次舒张压
盛韬	5	5	5	5	75	73	74	74	98	95	98	100	65	68	65	67
罗金文	0	0	0	0	65	64	60	54	110	106	110	102	60	66	60	58
张龙	3	3	3	3	69	71	71	61	128	126	124	132	74	74	72	72
江才华	3	3	3	3	80	76	76	74	125	130	125	120	77	72	77	75
蔡明光	2	2	2	2	79	79	78	61	99	97	99	102	59	65	59	56
周斌	8	8	8	8	74	70	70	70	97	94	96	97	58	62	60	61
唐定国	5	5	5	5	58	59	59	58	109	106	109	104	72	70	72	72
陈浩	12	10	12	10	71	70	70	68	110	107	110	112	69	65	69	68
宋海波	5	5	5	6	78	77	78	74	94	98	94	96	53	60	58	53
吴海波	11	11	11	10	66	66	66	67	107	102	107	110	72	70	70	75
彭桦	3	3	3	8	95	95	92	86	116	110	116	110	77	70	70	78
李文雄	0	0	0	5	83	85	85	91	97	92	97	92	67	68	69	69
何义	0	0	0	7	70	69	65	68	114	106	114	110	64	65	65	68
曾凡彬	3	3	3	3	65	65	65	62	97	100	97	102	64	66	66	66
贺盛开	12	10	10	10	61	60	65	67	113	110	111	110	75	70	70	78
黄婧波	0	5	3	5	69	69	69	62	117	115	115	116	76	77	77	76
杨其林	3	3	3	3	65	65	65	58	121	120	120	120	87	88	88	82
唐豹	5	6	4	5	69	65	70	65	107	109	109	109	60	65	66	56
李貌	2	2	2	10	73	73	73	67	110	114	112	109	69	70	68	68
陆胜	5	5	3	5	54	52	57	56	135	120	120	125	92	90	90	92
CC
陈向阳	50	50	50	60	68	70	69	72	112	110	110	117	71	73	70	78
刘敏	42	42	42	80	65	60	66	68	123	126	126	136	99	95	98	102
吴树	52	52	52	65	71	69	71	78	103	109	109	112	69	70	72	68
刘海浪	65	65	65	75	63	64	63	65	137	132	132	145	79	80	81	81
张斌	40	40	40	90	65	63	65	68	121	120	121	128	66	65	68	68
李超	52	40	50	60	68	68	70	84	111	110	111	126	58	60	62	62
苏兵	30	30	30	60	71	71	70	73	131	130	131	136	89	84	85	95
郑伟伟	35	35	35	45	73	70	73	76	131	129	131	135	72	70	71	73
禹巧	30	35	30	30	72	70	72	72	119	125	119	125	73	70	72	78
周华兵	50	50	50	60	67	65	65	75	135	140	137	141	75	76	74	82
邹巍	40	40	40	45	50	58	55	75	130	130	130	132	85	82	84	96
晋维	52	52	52	60	70	76	70	87	135	135	135	137	120	105	110	126
廖秋生	53	53	53	55	66	64	60	78	130	130	130	136	87	80	86	95
李根鹏	48	48	48	50	69	71	70	77	111	110	110	129	71	66	70	72
周江	40	40	40	40	70	68	65	63	120	122	122	126	74	70	72	78
阳敏	50	50	50	80	72	77	70	81	111	105	105	131	58	62	59	62
刮德军	68	70	65	50	78	76	75	88	92	95	98	105	56	66	62	62
刘丹	45	40	45	50	69	69	70	70	104	106	104	107	63	60	62	69
晏佞斌	40	45	40	45	76	74	75	88	105	109	105	125	72	70	70	75
戴治华	40	40	40	40	67	69	50	84	115	110	115	121	76	77	85	81
彭显国	65	65	65	100	72	71	72	81	92	90	92	107	55	56	55	62
刘梓林	47	47	47	75	76	78	76	77	132	130	128	135	89	80	85	96
张国梁	63	60	63	65	74	72	71	78	121	119	121	125	82	85	85	86
周伟	42	42	42	40	75	73	77	82	121	120	119	129	73	76	74	79
钟志明	45	45	45	45	69	70	67	73	111	111	111	127	71	70	70	76
胡帅	38	42	40	75	70	69	71	67	108	110	108	121	58	66	60	62
张超	55	50	50	70	71	70	70	78	97	90	94	109	62	60	60	69
杨浩	40	40	40	45	69	70	68	72	113	110	110	117	67	68	67	72
陈林	30	30	30	50	84	72	78	84	123	120	120	131	72	73	70	76
李安兵	52	52	50	40	70	68	68	77	100	108	107	115	71	70	74	75
曾继亮	50	55	50	90	67	64	64	82	92	90	90	108	62	60	64	68
刘雄伟	30	30	30	40	62	65	63	75	121	109	109	119	64	66	64	64
杨先武	50	50	50	30	73	77	74	75	148	140	146	147	95	90	90	96
刘宗付	62	60	62	65	72	66	65	78	120	120	120	121	81	80	82	82
张彬波	65	65	65	35	61	60	62	73	133	135	130	139	95	95	94	95
刘京肖	60	60	60	100	68	69	70	72	122	119	122	128	81	80	80	83
廖明	65	65	65	65	75	70	82	88	115	110	115	126	75	70	75	76
盛金博	56	56	55	60	74	73	71	82	120	125	120	128	70	70	72	79
李龙	30	35	35	30	72	70	71	80	141	140	141	148	86	84	85	88
石柱	35	30	35	30	72	70	70	79	111	110	111	121	78	74	76	79
廖洪亭	45	45	45	80	72	74	72	84	114	125	114	130	71	70	75	75
饶作兴	40	40	40	30	69	75	74	82	133	125	133	138	74	71	74	76
朱葱葱	45	45	45	50	70	72	70	80	119	120	119	125	77	77	74	79
刘源	45	40	45	90	67	67	68	81	108	110	108	109	64	62	64	69
徐炯	45	40	45	90	76	76	75	79	111	105	111	124	63	64	62	66
宋镪玮	55	55	55	60	72	70	72	80	112	107	107	126	72	70	70	78
高彪	45	45	40	70	69	67	68	71	114	110	110	121	69	60	70	75
林飞	40	40	40	100	72	70	71	81	132	128	128	135	91	87	90	98
陈舒	40	45	40	30	70	66	66	81	118	110	110	124	63	62	62	69
李建国	55	55	55	60	75	78	78	75	100	102	102	112	71	68	68	86
吴谦	45	45	45	65	72	69	69	82	119	110	110	130	73	70	70	82
胡呈武	35	35	40	54	71	72	72	81	119	108	108	126	63	61	62	68
潘文广	40	40	40	80	73	72	70	81	124	120	123	131	76	70	75	79
谢颖	45	40	42	70	69	71	72	78	121	120	122	129	79	79	78	81
